# Supplementary material for: GLP-1 receptor agonist ameliorates experimental lung fibrosis
Source: PubMed Central journal article supplement (PMC7581713; doi:10.1038/s41598-020-74912-1), 2020-10-22
Supplement: 41598_2020_74912_MOESM1_ESM.pdf [file 41598_2020_74912_MOESM1_ESM.pdf]

## GLP-1 receptor agonist ameliorates experimental lung fibrosis

Juan Fandiño Gómez, Laura Toba Estévez, Lucas González Matías, Yolanda Diz Chaves & Federico Mallo Ferrer\*

AUTHORS AFFILIATION:

Laboratory of Endocrinology (LabEndo) – The Biomedical Research Centre (CINBIO) – University of Vigo – Campus Universitario de Vigo (CUVI) – e-36310 – Vigo – SPAIN.

### SUPPLEMENTARY INFORMATION

#### Supplementary Figure S1

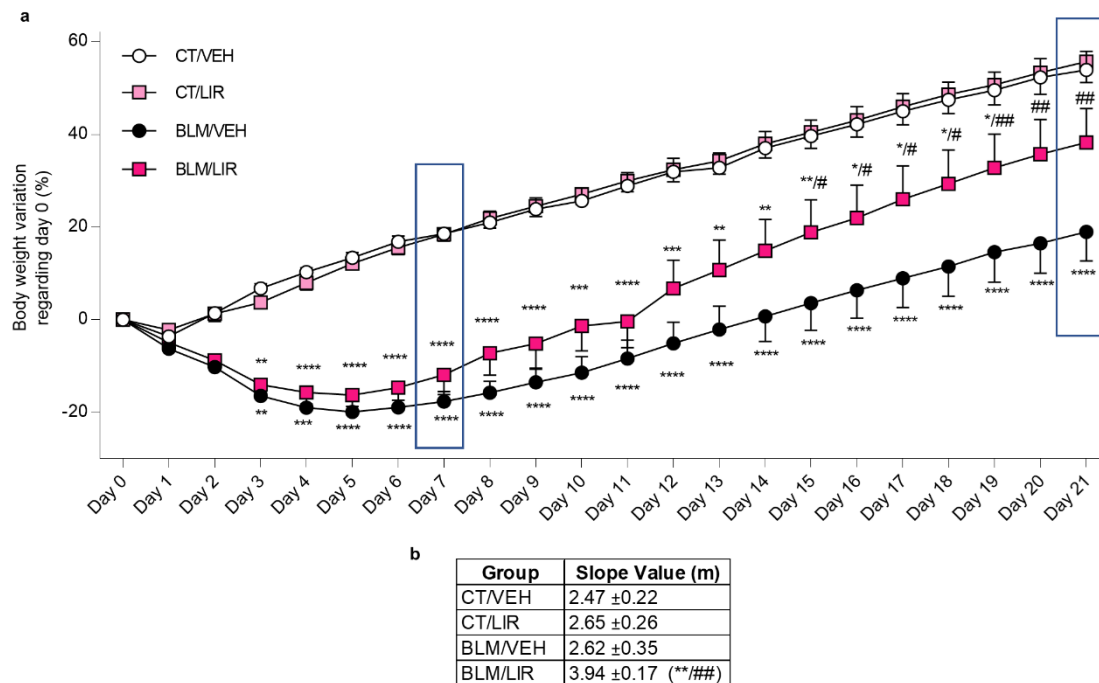

**Supplementary Figure S1.** Body weight variation during the experimental period. Control (CT) groups n=8; Bleomycin (BLM) groups n=12. **(a)** Body weight variation represented as a percentage of body weight in respect to day 0 of experiment. Two-way ANOVA following Bonferroni's multiple comparison test. \*  $p \leq 0.05$ ; \*\*  $p \leq 0.01$ ; \*\*\*  $p \leq 0.001$ ; \*\*\*\*  $p \leq 0.0001$  vs. CT/VEH; #  $p \leq 0.05$ ; ##  $p \leq 0.01$  vs. BLM/VEH. **(b)** Calculated slope of the body weight gain between day 7 and day 21 of the experiment; data represented as gram of body weight gain per 100 g per day (g/100g/day). Two-way ANOVA following Bonferroni's multiple comparison test. \*\*  $p \leq 0.01$  vs CT/VEH; ##  $p \leq 0.01$  vs BLM/VEH.

## Supplementary Figure S2

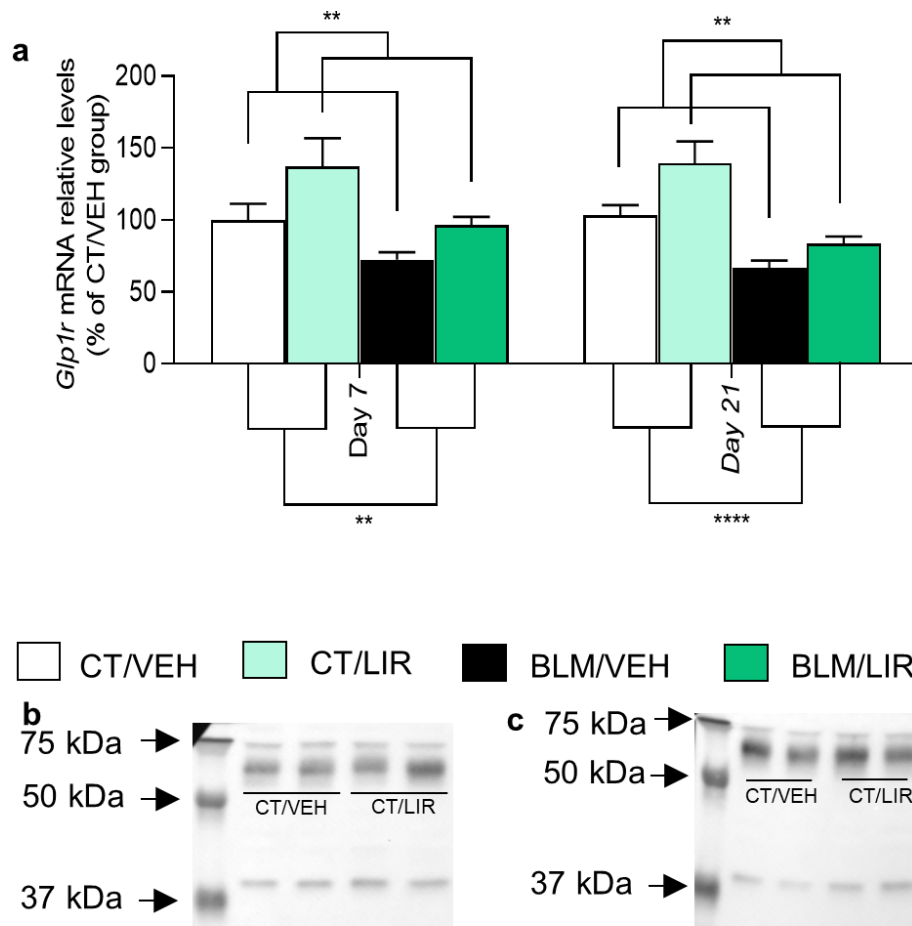

**Supplementary Figure S2.** mRNA expression of GLP-1 receptor in lung tissue. Bars represent mean, and error bars SEM. Two-way ANOVA test. \*\*  $p \leq 0.01$ ; \*\*\*\*  $p \leq 0.0001$ . **(a)** Day 7 and day 21 mRNA levels of glucagon-like peptide 1 receptor (*Glp1r*) normalized to CT/VEH group.  $n = 5-8$  per group. **(b)** Representative Western-Blot cropped membrane of Day 7 GLP-1R protein. **(c)** Representative Western-Blot cropped membrane of Day 21 GLP-1R protein.

## Supplementary Table T1

### RT PCR primers used.

| Gene (accession number)        | Forward primer sequence       | Reverse primer sequence       | Product length (bp) | PCR efficiency (%) | cDNA dilution | Housekeeping gene |
|--------------------------------|-------------------------------|-------------------------------|---------------------|--------------------|---------------|-------------------|
| <i>Actb</i> (NM_031144.3)      | 5'-CACCATGTACCCAGGCATTG-3'    | 5'-CCTGCTTGCTGATCCACATC-3'    | 173                 | 99.8               | 1:32          |                   |
| <i>Gapdh</i> (NM_017008.4)     | 5'-AGCCCAAGAACATCATCCCTG-3'   | 5'-GCATGTCAAGTCCCAACACGG-3'   | 136                 | 104.7              | 1:32          |                   |
| <i>Acta2</i> (NM_031004.2)     | 5'-GGAGATGGCGTGAICTACAAA-3'   | 5'-CGCTCAGCAGTAGTCACGAA-3'    | 152                 | 101.9              | 1:32          | <i>Actb</i>       |
| <i>Agt</i> (NM_134432.2)       | 5'-GCTGGAGCTAAAGGACACACA-3'   | 5'-GCAAGTGCTCTTGCTGTAGTA-3'   | 169                 | 101.2              | 1:8           | <i>Gapdh</i>      |
| <i>Agtr1a</i> (NM_030985.4)    | 5'-TTCGTGGCTTGAGTCCTGTT-3'    | 5'-GGTGATCACTTCTGGGAGGG-3'    | 178                 | 96.6               | 1:32          | <i>Gapdh</i>      |
| <i>Agtr2</i> (NM_012494.3)     | 5'-CCGTGACCAAAGCTTGAAAGATG-3' | 5'-AGGGAAGCCAGCAAATGATG-3'    | 65                  | 99.3               | 1             | <i>Actb</i>       |
| <i>Arg1</i> (NM_017134.3)      | 5'-GCAGAGACCCAGAAAGTGAAC-3'   | 5'-CGGAGTGTGATGTCAAGTGAAGC-3' | 144                 | 101.0              | 1:8           | <i>Gapdh</i>      |
| <i>Col1a1</i> (NM_053304.1)    | 5'-TGCAACATGGAGACAGGTCA-3'    | 5'-CGCTCCATACTCGAACTGG-3'     | 151                 | 106.3              | 1:32          | <i>Gapdh</i>      |
| <i>Ctgf</i> (NM_022266.2)      | 5'-CGCCAAACCGCAAGATTG-3'      | 5'-CGCTCCATACTCGAACTGG-3'     | 69                  | 109.8              | 1:16          | <i>Gapdh</i>      |
| <i>Fn1</i> (NM_019143.2)       | 5'-CAACTTCTGGTCCCTCCTCCG-3'   | 5'-GGACCCCTGAGCATTTGAG-3'     | 158                 | 96.1               | 1:32          | <i>Gapdh</i>      |
| <i>Glp-1R</i> (NM_012728.1)    | 5'-AGTAGTGTGCTCCAAGGGCAT-3'   | 5'-AAGAAAATGCGTACCCACCG-3'    | 190                 | 106.2              | 1:32          | <i>Gapdh</i>      |
| <i>Mas1</i> (NM_012757.2)      | 5'-CTGGTCAACCTTTGGGAACCT-3'   | 5'-AAAGGGTTGGCGCTGCTA-3'      | 72                  | 101.9              | 1:2           | <i>Gapdh</i>      |
| <i>Nkx2-1</i> (NM_013093.1)    | 5'-CTTACCAAGACACCATGCGG-3'    | 5'-CTCATTTCAATGCCCCTCGC-3'    | 118                 | 104.0              | 1:32          | <i>Gapdh</i>      |
| <i>P4ha3</i> (NM_198775.1)     | 5'-TTCCTTGTCTACAGCCCAAGAC-3'  | 5'-TAGCCCTCATAGGTGCCC-3'      | 156                 | 99.7               | 1:32          | <i>Gapdh</i>      |
| <i>Pycr1</i> (NM_001105857.2)  | 5'-CTGTGGAAAGCCTCCTGTATCC-3'  | 5'-CGGCTTAAATGGCCAGAAAG-3'    | 152                 | 106.4              | 1:4           | <i>Gapdh</i>      |
| <i>Sftpa1</i> (NM_001270645.1) | 5'-CTGCCAGGATTTCCAGCTTAC-3'   | 5'-TTGACTGACTGCCCATGGT-3'     | 155                 | 100.6              | 1:32          | <i>Gapdh</i>      |
| <i>Sftpb</i> (NM_138842.1)     | 5'-CTGTGCCAAGAGGTGAGGA-3'     | 5'-CAAGCAGCTTCAAGGGTAGG-3'    | 124                 | 108.2              | 1:32          | <i>Gapdh</i>      |
| <i>Sftpc</i> (NM_017342.2)     | 5'-TGCTGCCCGTGCATCTCAA-3'     | 5'-TTCACTCAGGGCGAGGCGTT-3'    | 180                 | 94.3               | 1:32          | <i>Gapdh</i>      |
| <i>Tgfb1</i> (NM_021578.2)     | 5'-GCTGAACCAAGGACGGAA-3'      | 5'-CCTGACGTTGGGACTGAT-3'      | 114                 | 96.9               | 1:16          | <i>Gapdh</i>      |

This table represent gene name and accession number of NCBI, primer pair sequence, the length of the amplicon, the efficiency of the PCR reaction calculated by the slope of the standard curve, the dilution of the cDNA used for the PCR reaction and the housekeeping gene used for the normalization of the gene expression.
